# Supplementary material for: Both Manuka and Non-Manuka Honey Types Inhibit Antibiotic Resistant Wound-Infecting Bacteria
Source: MDPI journal article supplement (doi:10.3390/antibiotics11081132), 2022-08-20
Supplement: s1 [file s1]

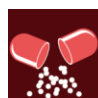**Supplemental Table S1.** Dunn's post hoc p-values for comparison of honey type and average MIC for all bacteria species.

| Comparison                                            | p-value  |
|-------------------------------------------------------|----------|
| Acacia vs Clover                                      | >0.9999  |
| Acacia vs Manuka                                      | <0.0001* |
| Acacia vs Orange Blossom                              | 0.9999   |
| Acacia vs Summer Arkansas Wildflower                  | 0.0002*  |
| Acacia vs Non Arkansas Wildflower                     | >0.9999  |
| Clover vs Manuka                                      | <0.0001* |
| Clover vs Orange Blossom                              | >0.9999  |
| Clover vs Summer Arkansas Wildflower                  | 0.0388*  |
| Clover vs Non Arkansas Wildflower                     | >0.9999  |
| Manuka vs Orange Blossom                              | <0.0001* |
| Manuka vs Summer Arkansas Wildflower                  | 0.3850   |
| Manuka vs Non Arkansas Wildflower                     | <0.0001* |
| Orange Blossom vs Summer Arkansas Wildflower          | 0.0011*  |
| Orange Blossom vs Non Arkansas Wildflower             | >0.9999  |
| Summer Arkansas Wildflower vs Non Arkansas Wildflower | 0.0056*  |

\* indicates significant differences

**Supplemental Table S2.** : One-way ANOVA, Tukey's post hoc p-values for comparison of Manuka, summer Arkansas wildflower honey, and spring Arkansas wildflower honey to six different micro-organisms.

| Organism             | Comparison                           | p-value  |
|----------------------|--------------------------------------|----------|
| <i>K. pneumoniae</i> | Manuka vs Summer Arkansas Wildflower | 0.2104   |
|                      | Manuka vs Spring Arkansas Wildflower | 0.0005*  |
|                      | Summer vs Spring Arkansas Wildflower | 0.0975   |
| <i>E. coli</i>       | Manuka vs Summer Arkansas Wildflower | 0.4304   |
|                      | Manuka vs Spring Arkansas Wildflower | 0.0002*  |
|                      | Summer vs Spring Arkansas Wildflower | 0.0238*  |
| <i>P. aeruginosa</i> | Manuka vs Summer Arkansas Wildflower | 0.9418   |
|                      | Manuka vs Spring Arkansas Wildflower | 0.1453   |
|                      | Summer vs Spring Arkansas Wildflower | 0.3509   |
| <i>A. baumannii</i>  | Manuka vs Summer Arkansas Wildflower | 0.0020*  |
|                      | Manuka vs Spring Arkansas Wildflower | 0.0047*  |
|                      | Summer vs Spring Arkansas Wildflower | 0.7236   |
| BORSA                | Manuka vs Summer Arkansas Wildflower | 0.0043*  |
|                      | Manuka vs Spring Arkansas Wildflower | 0.0002*  |
|                      | Summer vs Spring Arkansas Wildflower | 0.8496   |
| VISA                 | Manuka vs Summer Arkansas Wildflower | 0.0010*  |
|                      | Manuka vs Spring Arkansas Wildflower | <0.0001* |
|                      | Summer vs Spring Arkansas Wildflower | 0.4066   |
| <i>E. aerogenes</i>  | Manuka vs Summer Arkansas Wildflower | 0.0846   |
|                      | Manuka vs Spring Arkansas Wildflower | 0.0003*  |
|                      | Summer vs Spring Arkansas Wildflower | 0.1825   |

\* indicates statistical differences.
